# Supplementary material
Source: PubMed Central journal article supplement (PMC3340220)
Supplement: supp_M111.322362_jbc.M111.322362-1.pdf [file supp_M111.322362_jbc.M111.322362-1.pdf]

## Figure S1

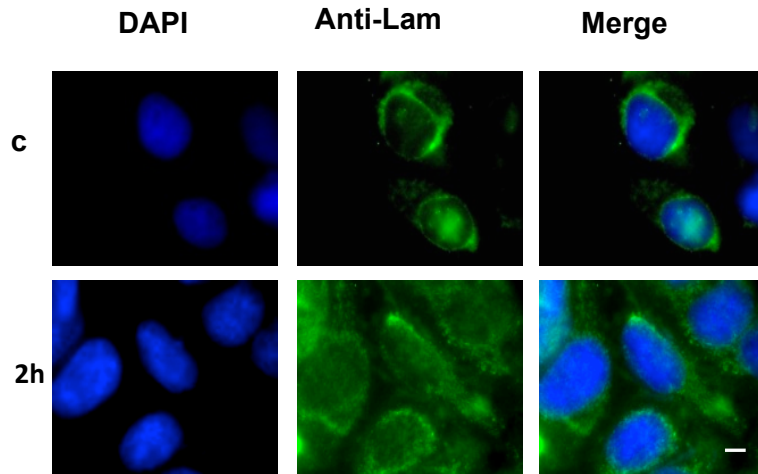

**FIGURE S1.** Disintegration of nuclear lamin following treatment with C7H2 peptide. HeLa cells were treated with 0.3 mM C7H2 for 2 h. Left column: DAPI nuclear staining; middle column: anti-lamin B1 + B2 antibody, secondary biotinylated anti-mouse IgG and streptavidin-FITC conjugate; right column: merge. C, untreated control cells. Deconvolution microscopy, bar 20  $\mu\text{m}$ .
