# Supplementary material
Source: PubMed Central journal article supplement (PMC3340220)
Supplement: supp_M111.322362_jbc.M111.322362-2.pdf [file supp_M111.322362_jbc.M111.322362-2.pdf]

Figure S2

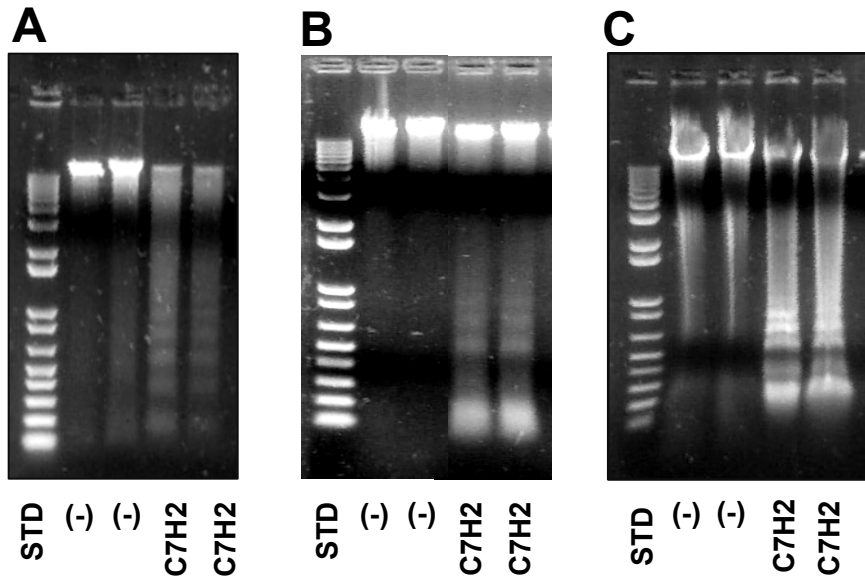

**FIGURE S2.** C7H2 peptide induces DNA degradation in tumor cells. DNA degradation in HeLa (A), U87-MG (B) and SKBR3 (C) cells, induced by C7H2 at 0.3 mM for 20 h; the experiments were run in duplicate. Controls (-) are shown and also the standard (STD) DNA ladder fragments.
