# Supplementary material
Source: PubMed Central journal article supplement (PMC3340220)
Supplement: supp_M111.322362_jbc.M111.322362-3.pdf [file supp_M111.322362_jbc.M111.322362-3.pdf]

Figure S3

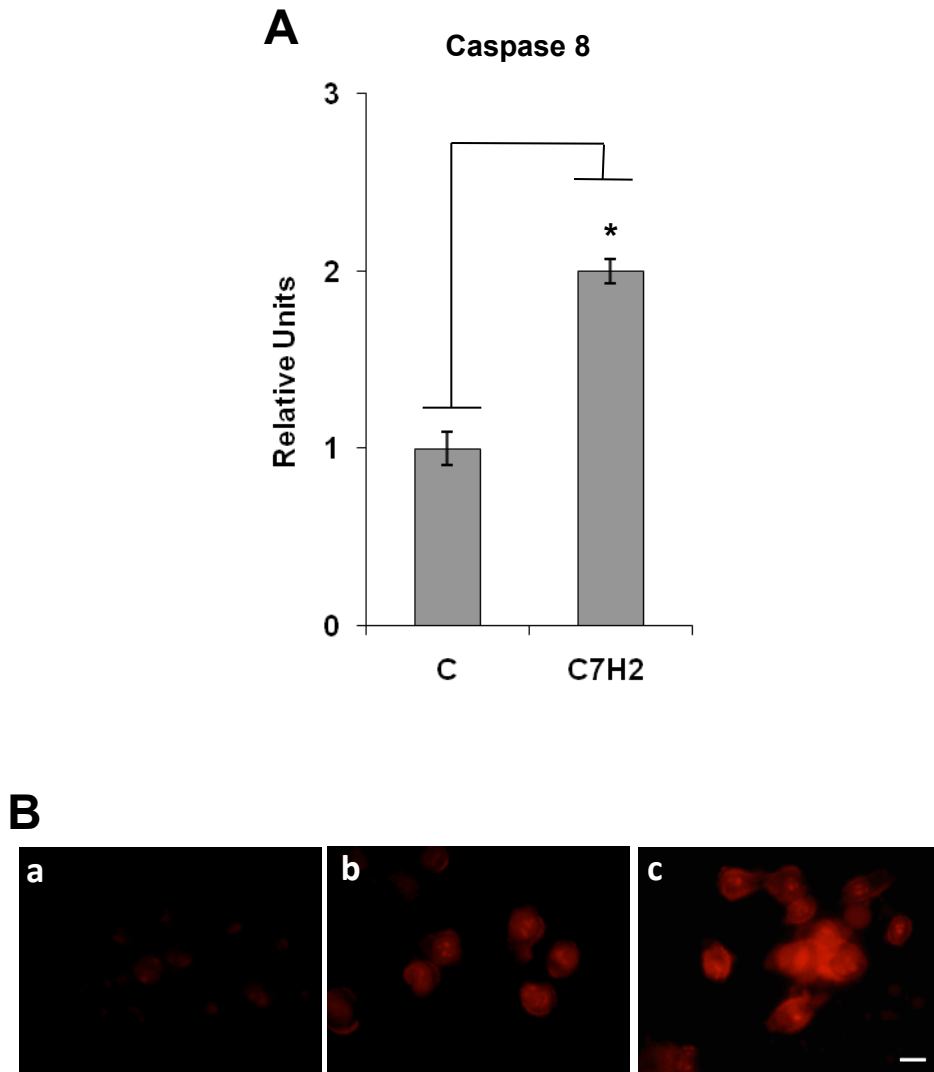

**FIGURE S3.** Caspase 8 activation and superoxide production induced by C7H2 peptide. A. HeLa cells incubated with C7H2 for 40 min induce increased production of caspase 8 analyzed by colorimetric assay. B. Anion superoxide produced by HeLa cells treated with 0.3 mM C7H2. (a) untreated cells; (b) positive control with 5 mM  $H_2O_2$ ; (c) cells treated with C7H2. Anion superoxide production detected with dihydroethidium (DHE) by fluorescence microscopy. Bar, 20  $\mu$ m.
