# Supplementary material
Source: PubMed Central journal article supplement (PMC3340220)
Supplement: supp_M111.322362_jbc.M111.322362-5.pdf [file supp_M111.322362_jbc.M111.322362-5.pdf]

Figure S5

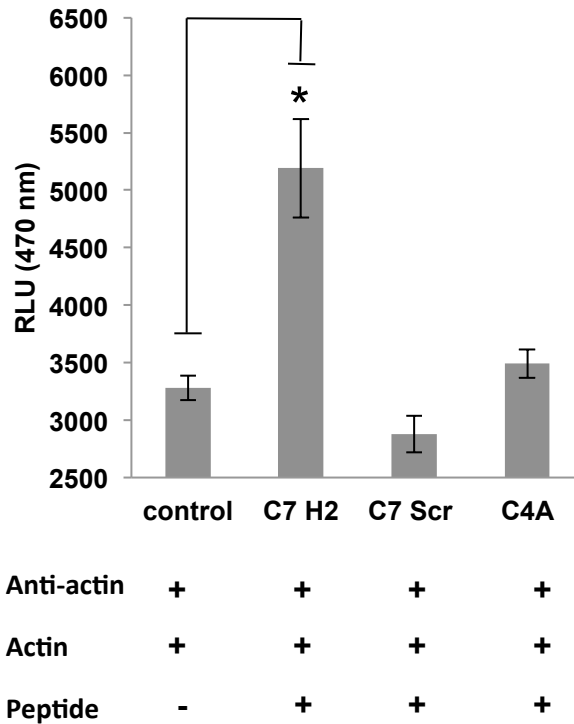

**FIGURE S5.** Binding of C4A peptide to  $\beta$ -actin and actin polymerization. ELISA plates were coated with bovine serum albumin with or without peptides: C7H2, C4A or scramble peptide Scr-C7H2, all at 500  $\mu\text{g/ml}$ .  $\beta$ -actin was added and then anti-actin antibody and the secondary anti-antibody. A clear binding of  $\beta$ -actin to C7H2 is observed,  $p < 0.01$ . Binding of C4A to  $\beta$ -actin was very poor,  $p = 0.082$  in relation to the control.
